# Supplementary material for: NeuroMotion smartphone application for remote General Movements Assessment: a feasibility study in Nepal
Source: HighWire-hosted journal article supplement (doi:10.1136/bmjopen-2023-080063), 2024-03-01
Supplement: bmjopen-2023-080063supp001_data_supplement.pdf [file bmjopen-2023-080063supp001_data_supplement.pdf]

Film #

Assessed by: \_\_\_\_\_

Date: \_\_\_\_\_

| Quality                             | Approved  |      | Not approved | Comments |
|-------------------------------------|-----------|------|--------------|----------|
|                                     | Excellent | Good | Indistinct   |          |
| <i>Picture quality</i>              |           |      |              |          |
| Sharpness                           |           |      |              |          |
| Camera is held in correct position  |           |      |              |          |
| Camera is held in a steady position |           |      |              |          |
| <i>Baby setting</i>                 |           |      |              |          |
| Clothing                            |           |      |              |          |
| Background/blanket                  |           |      |              |          |
| Supine position                     |           |      |              |          |
| Surrounding influences              |           |      |              |          |
| Baby's mood                         |           |      |              |          |
| Overall judgement:                  |           |      |              |          |
